# Supplementary material for: MXene with controlled surface termination groups for boosting photoelectrochemical water splitting
Source: Royal Society of Chemistry journal article supplement (doi:10.1039/d2ta06313a), 2022-01-01
Supplement: d2ta06313a1.pdf [file d2ta06313a1.pdf]

**Electronic Supplementary Information:**

**MXene with controlled surface termination groups for boosting photoelectrochemical water splitting**

Zihao Wu<sup>a,d</sup>, Hui Zong<sup>b</sup>, Baihe Fu<sup>a</sup>, Zhonghai Zhang<sup>a,c,\*</sup>

<sup>a</sup> Shanghai Key Laboratory of Green Chemistry and Chemical Processes, School of Chemistry and Molecular Engineer-ing, East China Normal University, Shanghai 200241, China

<sup>b</sup> Key Laboratory of Polar Materials and Devices (MOE), Department of Electronics, East China Normal University, Shanghai 200241, China

<sup>c</sup> Institute of Eco-Chongming, East China Normal University, 20 Cuiniao Road, Chongming District, Shanghai 202162, China

<sup>d</sup> Present address: Beijing National Laboratory for Molecular Sciences College of Chemistry and Molecular Engineer-ing, Peking University, Beijing 100871, China

E-mail: [zhzhang@chem.ecnu.edu.cn](mailto:zhzhang@chem.ecnu.edu.cn)

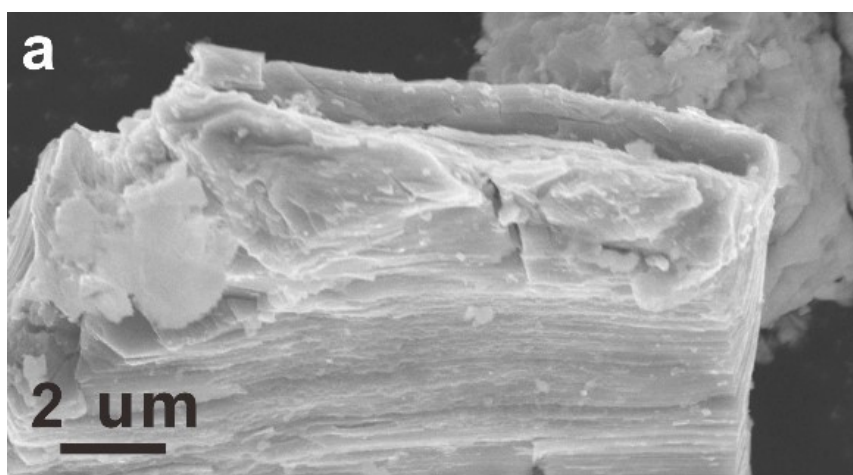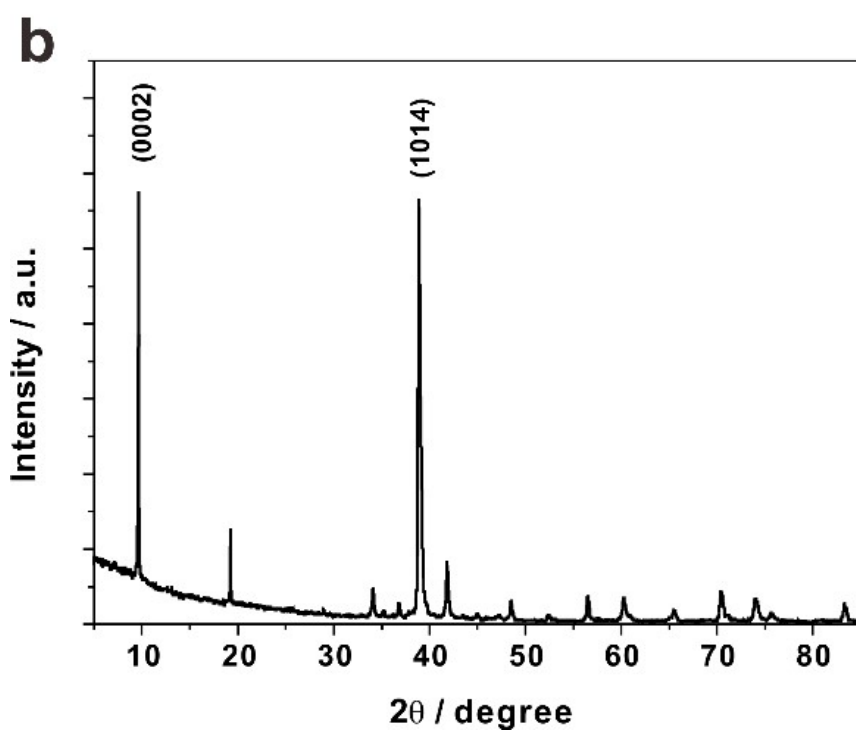

**Fig. S1** SEM image and XRD pattern of MAX phase of  $\text{Ti}_3\text{AlC}_2$ .

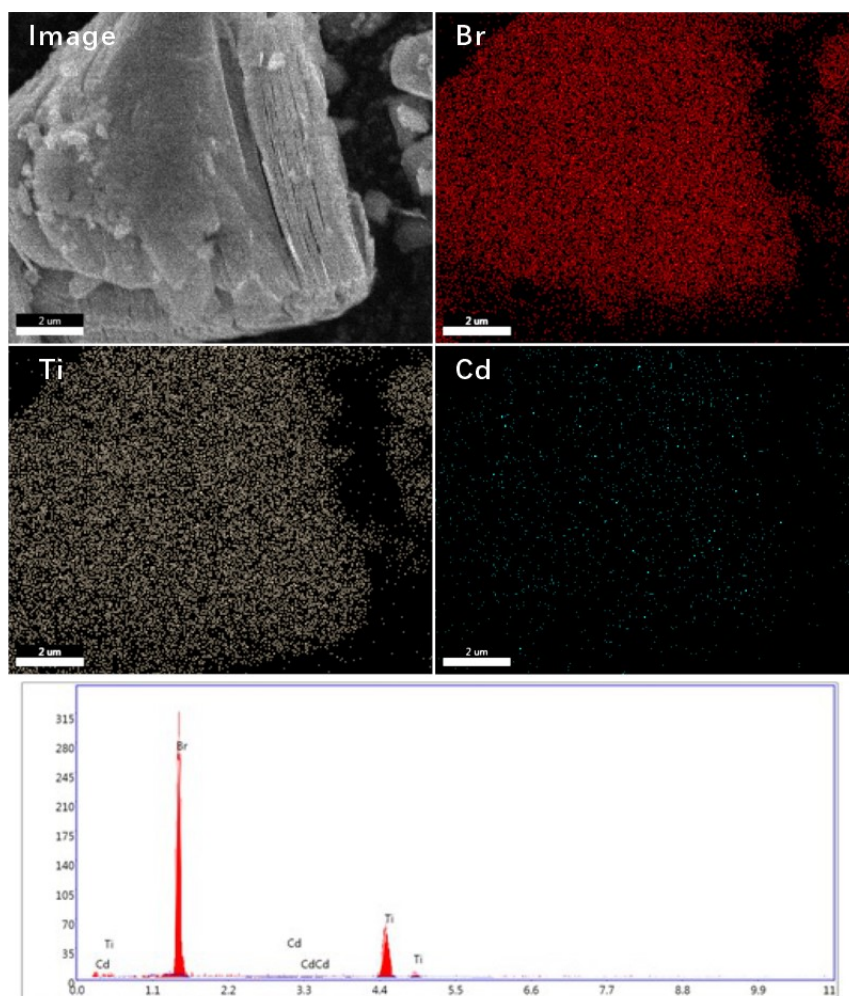

**Fig. S2** SEM image, corresponding elemental mapping, and EDS curve of multilayer Br-MXene.

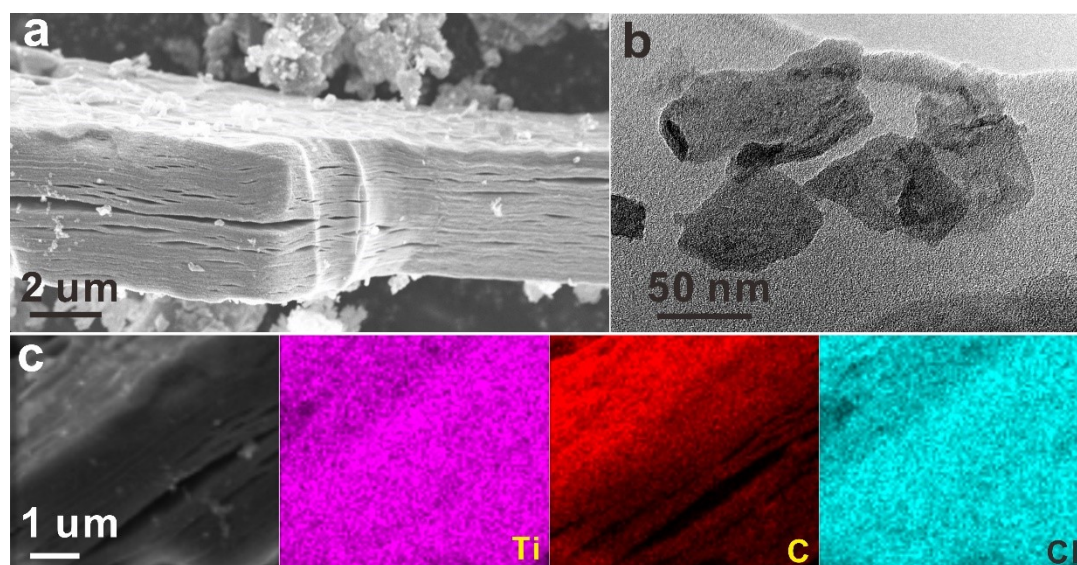

**Fig. S3** Morphology and elemental distribution of Cl-MXene. (a) SEM image of multilayer Cl-MXene, (b) TEM image of few-layer Cl-MXene, and (c) SEM image and elemental distribution of Ti, C, and Cl of Cl-MXene.

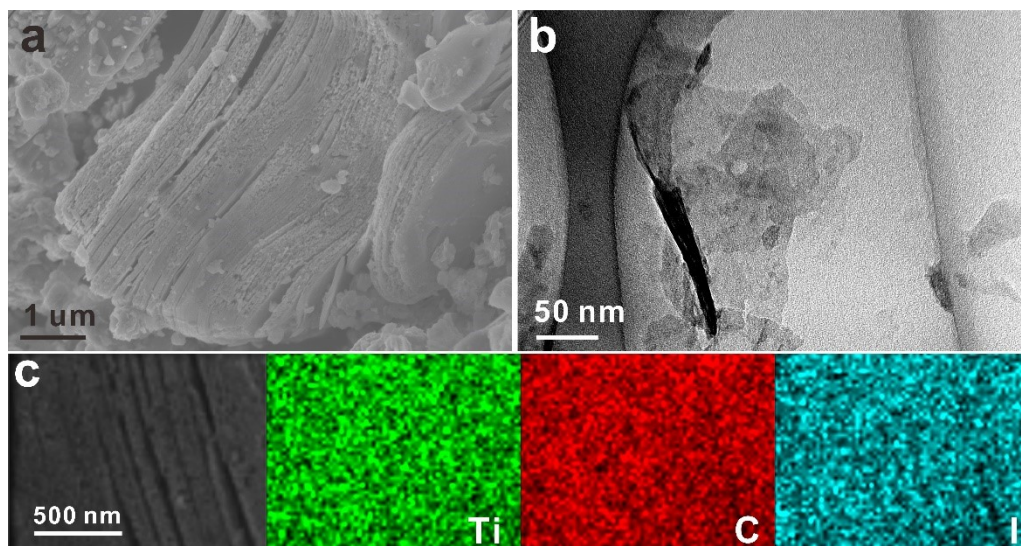

**Fig. S4** Morphology and elemental distribution of I-MXene. (a) SEM image of multi-layer I-MXene, (b) TEM image of few-layer I-MXene, and (c) SEM image and elemental distribution of Ti, C, and I of I-MXene.

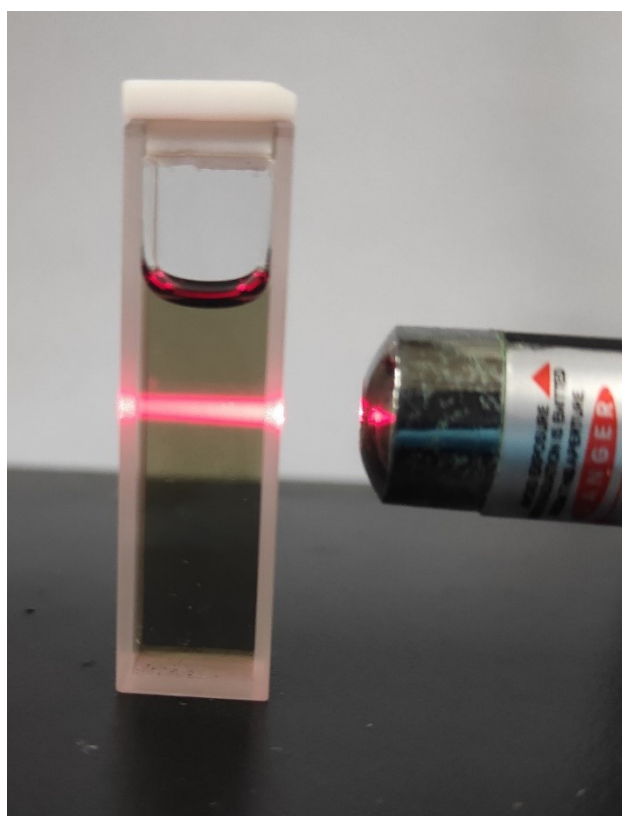

**Fig. S5** Tyndall effect of few-layer Br-MXene in aqueous solution.



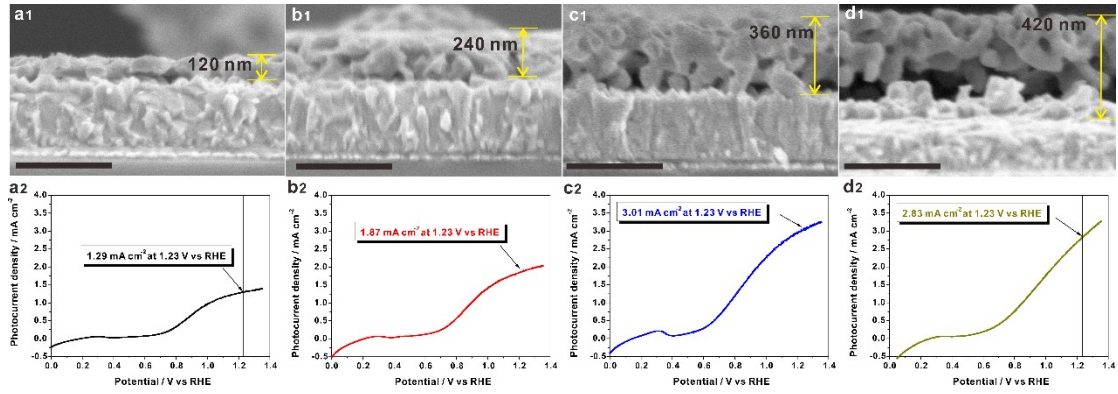

**Fig. S6** Morphological and PEC performance of BiVO<sub>4</sub> with different thickness. (a1) Cross-sectional SEM image and (a2) LSV curve under illumination of AM 1.5G of BiVO<sub>4</sub> with 120 nm thickness; (b1) cross-sectional SEM image and (b2) LSV curve under illumination of AM 1.5G of BiVO<sub>4</sub> with 240 nm thickness; (c1) cross-sectional SEM image and (c2) LSV curve under illumination of AM 1.5G of BiVO<sub>4</sub> with 360 nm thickness; (d1) cross-sectional SEM image and (d2) LSV curve under illumination of AM 1.5G of BiVO<sub>4</sub> with 420 nm thickness. The scale bar is 500 nm.

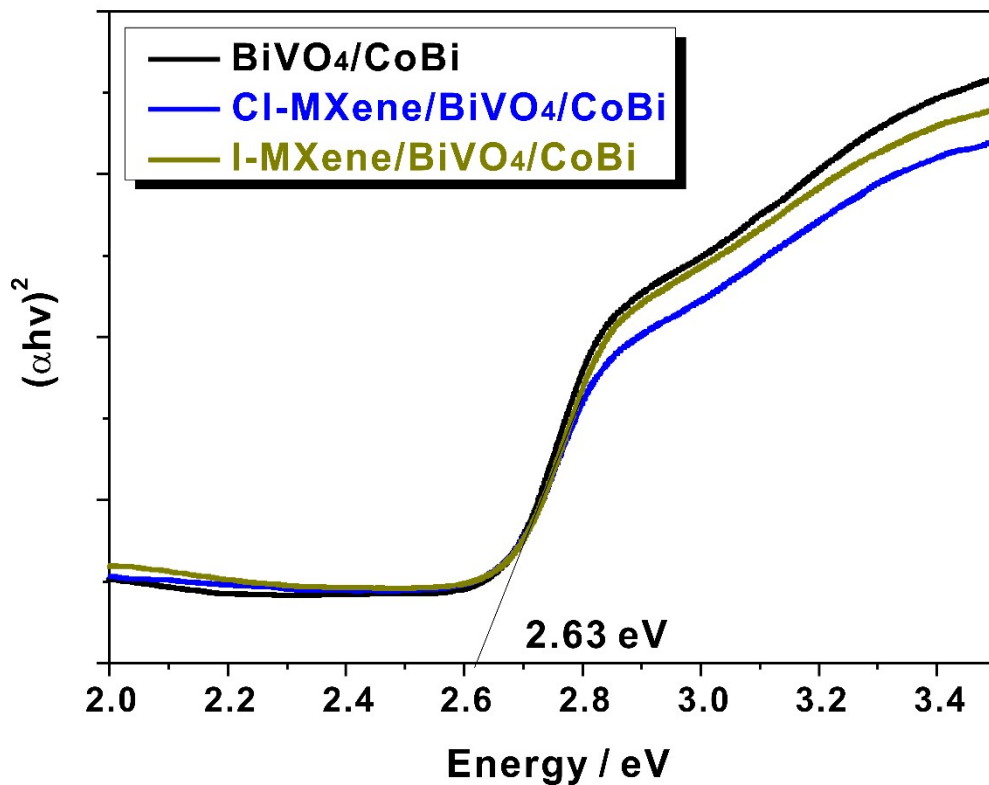

**Fig. S7** Tauc plots of BiVO<sub>4</sub>/CoBi, Cl-MXene/BiVO<sub>4</sub>/CoBi, and I-MXene/BiVO<sub>4</sub>/CoBi.

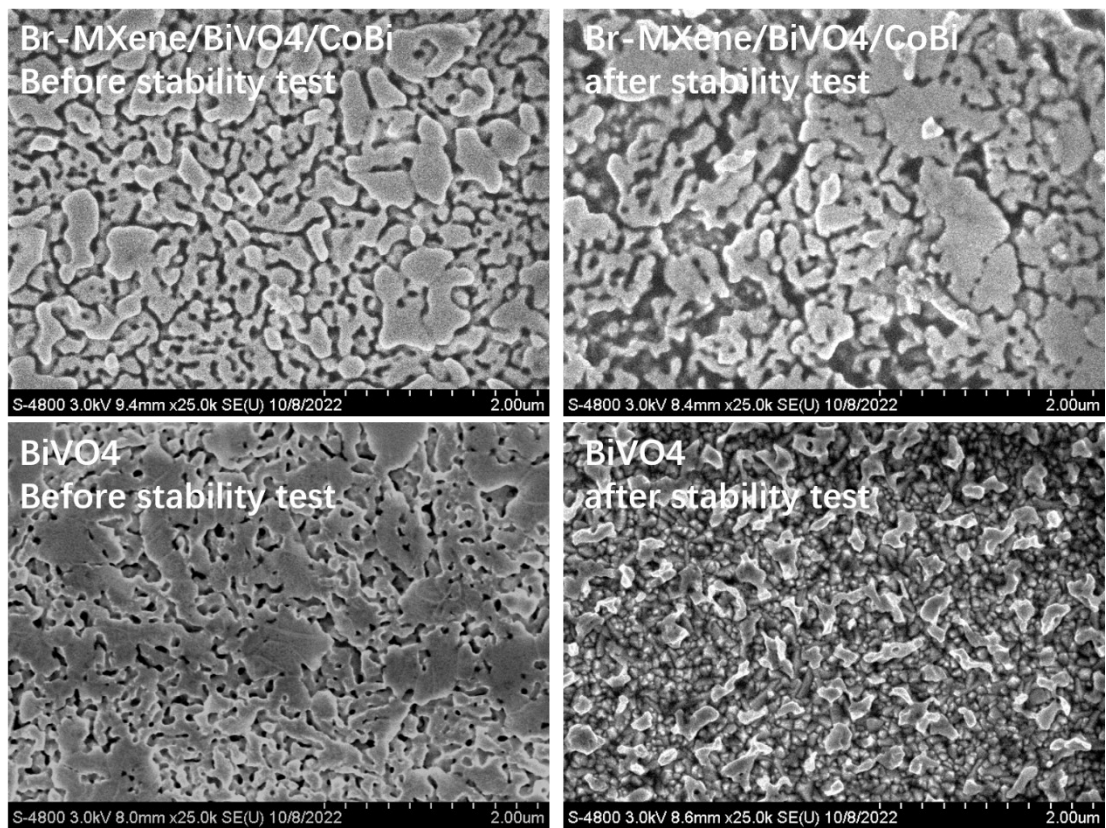

**Fig. S8** SEM image of BiVO<sub>4</sub> and Br-MXene/BiVO<sub>4</sub>/CoBi before and after stability test.

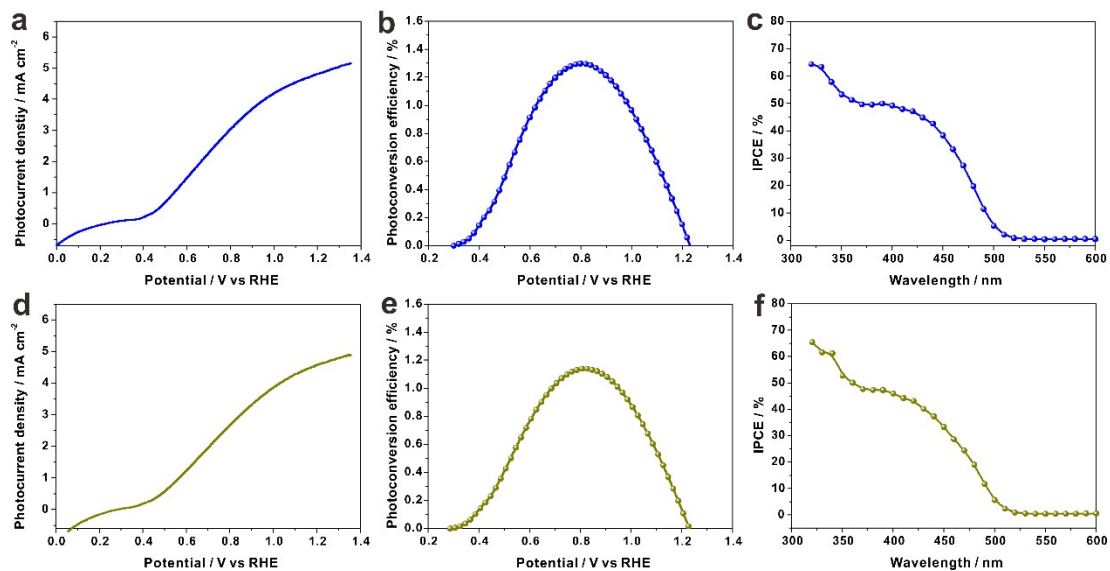

**Fig. S9** PEC performance of Cl-MXene/BiVO<sub>4</sub> and I-MXene/BiVO<sub>4</sub>. (a) LSV curve under illumination of AM 1.5G, (b) photoconversion efficiency at different potentials, and (c) IPCE plot of Cl-MXene/BiVO<sub>4</sub>/CoBi; (d) LSV curve under illumination of AM 1.5G, (e) photoconversion efficiency at different potentials, and (f) IPCE plot of I-MXene/BiVO<sub>4</sub>/CoBi.

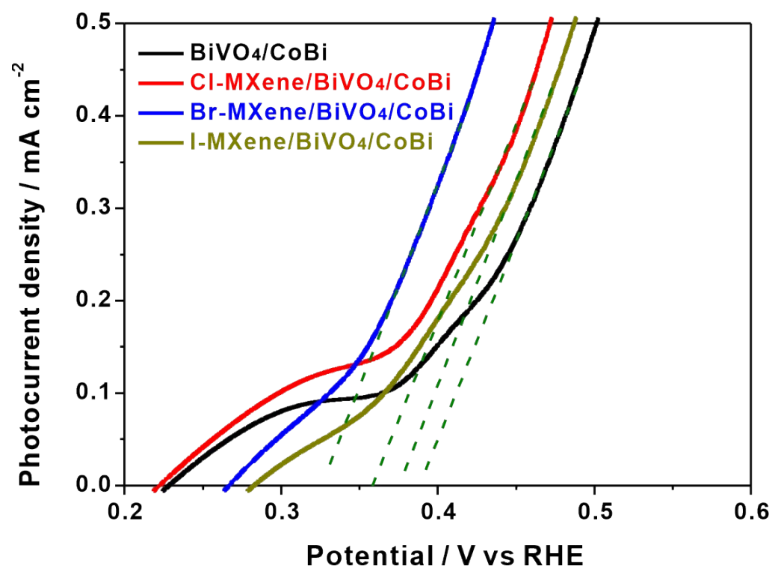

**Fig. S10** Onset potentials of  $\text{BiVO}_4/\text{CoBi}$ ,  $\text{Cl-MXene}/\text{BiVO}_4/\text{CoBi}$ ,  $\text{Br-MXene}/\text{BiVO}_4/\text{CoBi}$ , and  $\text{I-MXene}/\text{BiVO}_4/\text{CoBi}$  photoanodes.

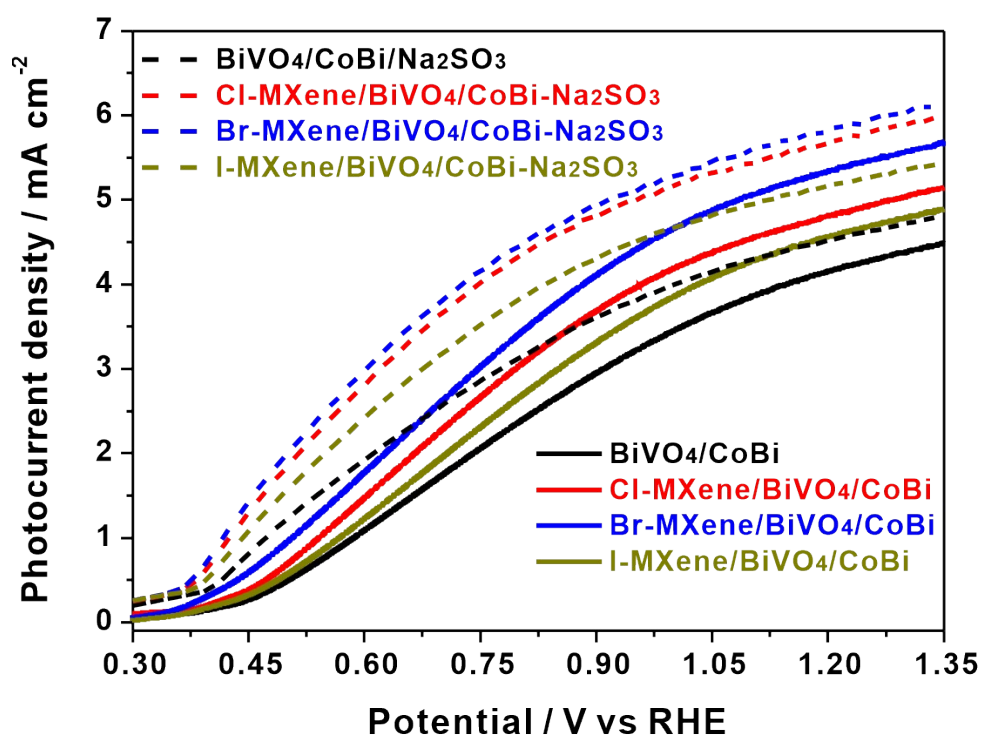

**Fig. S11** LSV curves of  $\text{BiVO}_4/\text{CoBi}$ ,  $\text{Cl-MXene}/\text{BiVO}_4/\text{CoBi}$ ,  $\text{Br-MXene}/\text{BiVO}_4/\text{CoBi}$ , and  $\text{I-MXene}/\text{BiVO}_4/\text{CoBi}$  in the absence and presence of  $\text{Na}_2\text{SO}_3$  under illumination of AM 1.5G.

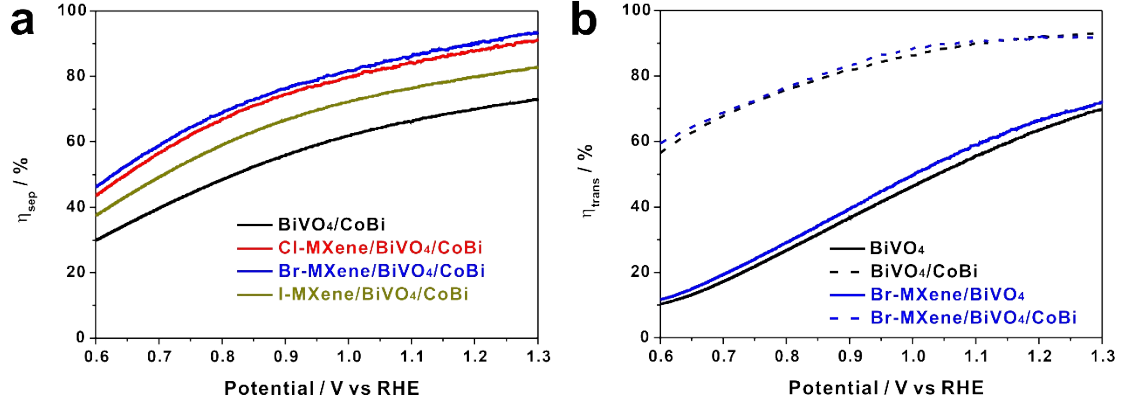

**Fig. S12** (a) Charge separation efficiency on BiVO<sub>4</sub>/CoBi, Cl-MXene/BiVO<sub>4</sub>/CoBi, Br-MXene/BiVO<sub>4</sub>/CoBi, and I-MXene/BiVO<sub>4</sub>/CoBi; (b) charge transfer efficiency on BiVO<sub>4</sub>, BiVO<sub>4</sub>/CoBi, Br-MXene/BiVO<sub>4</sub>, and Br-MXene/BiVO<sub>4</sub>/CoBi.

The charge separation efficiency and surface charge transfer efficiency of samples were estimated by using the following equations: <sup>1</sup>

$$LHE = 1 - 10^{-A(\lambda)}$$

Where  $A(\lambda)$  represents absorbance at wavelength equals  $\lambda$ . The maximum photocurrent density  $J_{max}$  was calculated from the number of photons above the photo-active range of BiVO<sub>4</sub> under AM 1.5G condition.

$$J_{abs} = J_{max} \times LHE$$

$$\eta_{sep} = J_{Na_2SO_3} / J_{abs}$$

$$\eta_{trans} = J_{water} / J_{Na_2SO_3}$$

As shown in Fig. S12a, the charge separation efficiency, estimated from comparison of photocurrent density in Na<sub>2</sub>SO<sub>3</sub> ( $J_{Na_2SO_3}$ ) and current density expressed from photon absorption rate ( $J_{abs}$ ), on photoanodes of BiVO<sub>4</sub>/CoBi, Cl-MXene/BiVO<sub>4</sub>/CoBi, Br-MXene/BiVO<sub>4</sub>/CoBi, and I-MXene/BiVO<sub>4</sub>/CoBi were recorded. The Y-MXene/BiVO<sub>4</sub>/CoBi (Y = Cl, Br, and I) presented certain amount of increase on charge separation efficiency to pristine BiVO<sub>4</sub>/CoBi, but the increase



was not significant. However, as shown in Fig. S12b, the charge transfer efficiency, estimated from ratios of photocurrent density in water ( $J_{\text{water}}$ ) and photocurrent density in  $\text{Na}_2\text{SO}_3$  ( $J_{\text{Na}_2\text{SO}_3}$ ), displayed obvious increase after modification of CoBi. The above results helped to indicate the electron transfer layer and hole transfer layer of Y-MXene and CoBi, respectively.

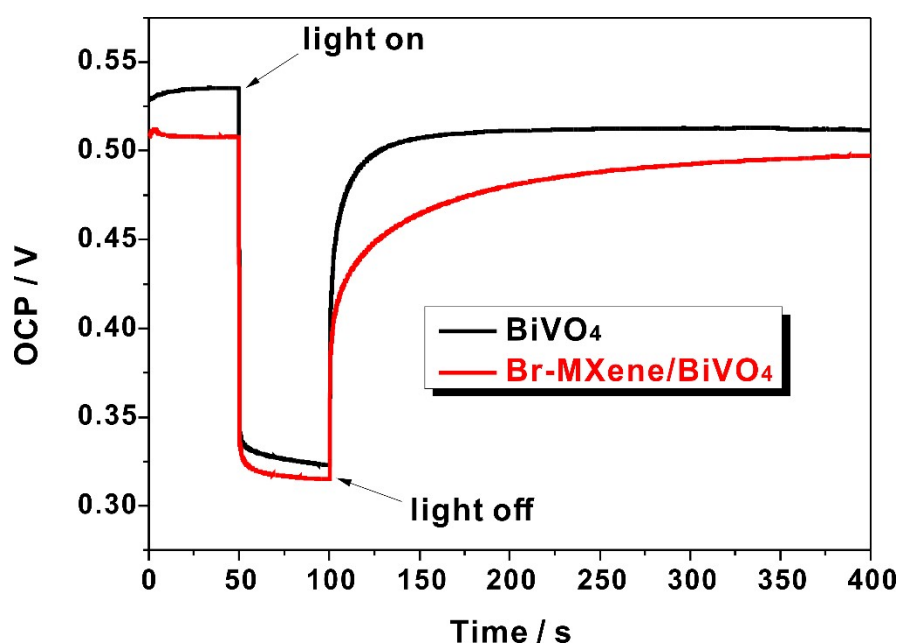

**Fig. S13** Open circuit potential (OCP) of  $\text{BiVO}_4$  and  $\text{Br-MXene/BiVO}_4$  with light-on-off model.

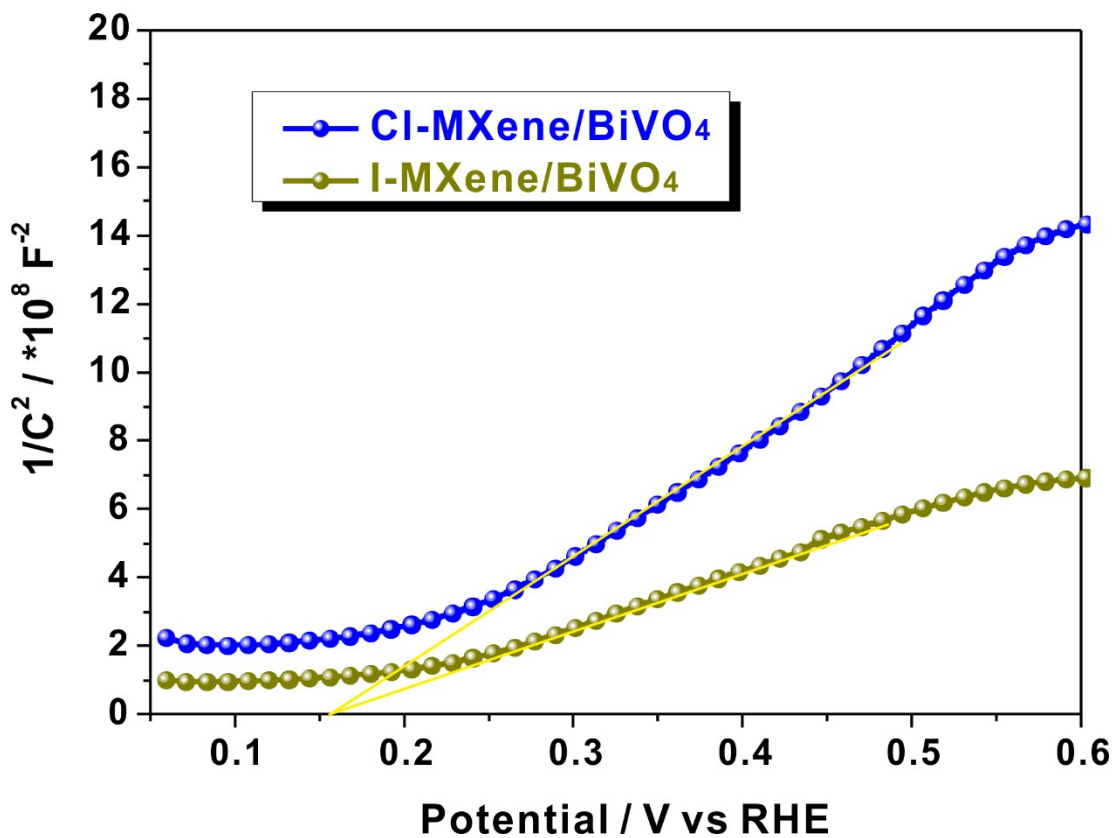

Fig. S14 Mott-Schottky plots of Cl-MXene/BiVO<sub>4</sub> and I-MXene/BiVO<sub>4</sub>.

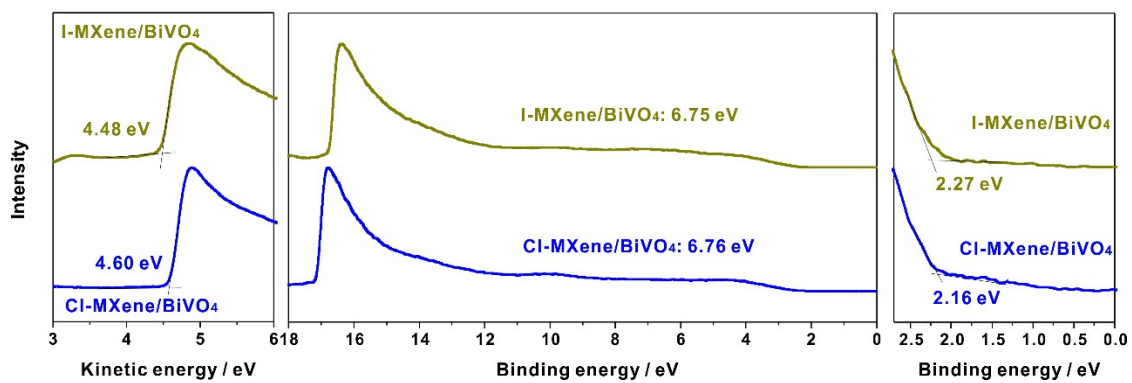

Fig. S15 UPS and valence spectra of Cl-MXene/BiVO<sub>4</sub> and I-MXene/BiVO<sub>4</sub>.

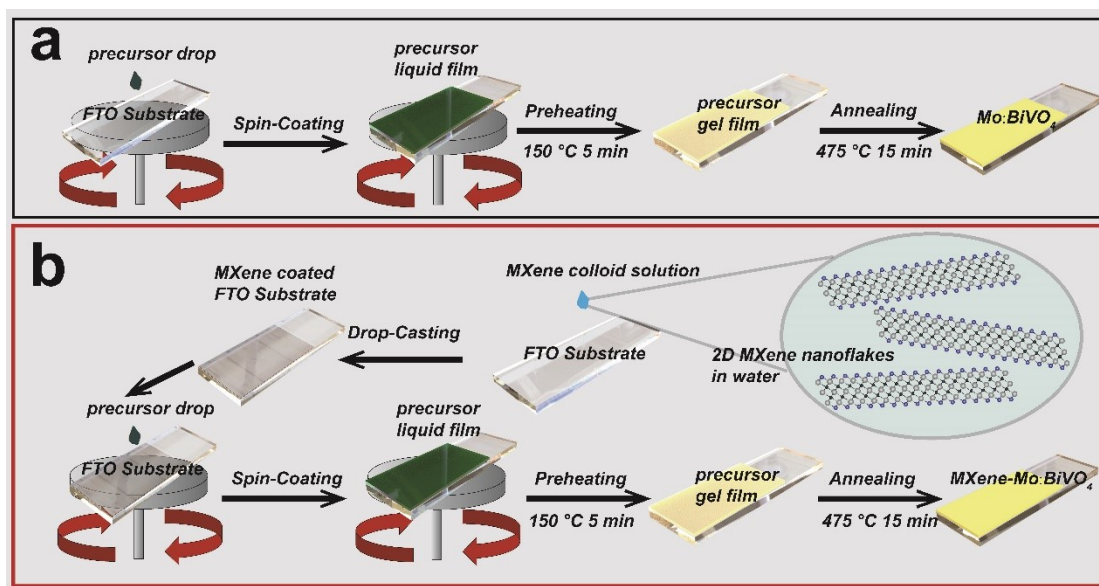

**Fig. S16** Fabrication procedures of (a) BiVO<sub>4</sub> and (b) MXene/BiVO<sub>4</sub>.

**Table S1.** Onset potential values on BiVO<sub>4</sub>/CoBi, Cl-MXene/BiVO<sub>4</sub>/CoBi, Br-MXene/BiVO<sub>4</sub>/CoBi, and I-MXene/BiVO<sub>4</sub>/CoBi photoanodes.

| Sample                           | Onset potential (V vs. RHE) |
|----------------------------------|-----------------------------|
| BiVO <sub>4</sub> /CoBi          | 0.395                       |
| Cl-MXene/BiVO <sub>4</sub> /CoBi | 0.365                       |
| Br-MXene/BiVO <sub>4</sub> /CoBi | 0.328                       |
| I-MXene/BiVO <sub>4</sub> /CoBi  | 0.380                       |

**Table S2.** Comparison of PEC performance of BiVO<sub>4</sub>-based photoanodes.

| Samples                                                  | Photocurrent density at 1.23 V vs RHE / mA cm <sup>-2</sup> | Photocurrent density at 1.23 V vs RHE with hole scavenger / mA cm <sup>-2</sup> | Stability          | Ref                                         |
|----------------------------------------------------------|-------------------------------------------------------------|---------------------------------------------------------------------------------|--------------------|---------------------------------------------|
| Mxene/BiVO <sub>4</sub> /FeOOH                           | 4.95                                                        | NA                                                                              | 77.6% after 2 h    | Mater. Today Chem. 2022, 23, 100747         |
| CoNi-MOFs/BiVO <sub>4</sub>                              | 3.2                                                         | NA                                                                              | 90% after 3 h      | Appl. Catal. B, Environ. 2020, 266, 118513  |
| F-BiVO <sub>4</sub> @NiFe-LDH                            | 2.67                                                        | NA                                                                              | Stable for 10 min  | Appl. Catal. B, Environ. 2020, 278, 119268  |
| HCoAl-LDH/BiVO <sub>4</sub>                              | 3.5                                                         | NA                                                                              | 86% after 3 h      | Appl. Catal. B, Environ. 2021, 286, 119875  |
| WO <sub>3</sub> /BiVO <sub>4</sub> /FeOOH/NiOOH          | 5.5                                                         | NA                                                                              | Stable for 5 h     | Nano. Lett. 2017, 17, 8012-8017.            |
| R-BiVO <sub>4</sub>                                      | 3.18                                                        | 5.84                                                                            | NA                 | ACS Appl. Energy Mater. 2020, 3, 4403-4410  |
| FeCoOx/BiVO <sub>4</sub>                                 | 4.82                                                        | 4.82                                                                            | Stable for 10 h    | Adv. Funct. Mater. 2018, 28, 1802685        |
| Mo:BiVO <sub>4</sub> /NTO/Fe:BiVO <sub>4</sub>           | 5.6                                                         | NA                                                                              | Stable for 16 h    | Adv. Funct. Mater. 2021, 31, 2011210        |
| C/BiVO <sub>4</sub> /CQD                                 | 4.83                                                        | NA                                                                              | Stable for 9 h     | Adv. Funct. Mater. 2022, 32, 2112738        |
| BiVO <sub>4</sub> /Fe <sub>x</sub> Ni <sub>1-x</sub> OOH | 5.8                                                         | NA                                                                              | Stable for 3 h     | Angew. Chem. Int. Ed. 2020, 59, 18990-18995 |
| CoBi/E-BiVO <sub>4</sub>                                 | 3.2                                                         | NA                                                                              | 80% after 1 h      | Angew. Chem. 2017, 129, 8620-8624           |
| Ov-BiVO <sub>4</sub> @NiFe-MOFs                          | 5.3                                                         | 5.3                                                                             | Stable for 10 h    | Angew. Chem. Int. Ed. 2021, 60, 1433-1440   |
| FeOOH/rGO/BiVO <sub>4</sub>                              | 3.25                                                        | 4.2                                                                             | Stable for 3 h     | ChemCatChem 2020, 12, 3769-3775             |
| E-BiVO <sub>4</sub> /BPQDs/OL-OEC                        | 6.2                                                         | NA                                                                              | Stable for 45 h    | Energy Environ. Sci. 2022, 15, 672-679      |
| OEC/MoO <sub>x</sub> /MQD/BiVO <sub>4</sub>              | 5.85                                                        | NA                                                                              | 97.5 % after 100 h | Angew. Chem. Int. Ed. 2022, 61, e202200946  |
| NiOOH/BP/BiVO <sub>4</sub>                               | 4.48                                                        | NA                                                                              | Stable for 60 h    | Nat. Commun. 2019, 10, 2001                 |
| La:BaSnO <sub>3</sub> /Mo:BiVO <sub>4</sub>              | 5.15                                                        | NA                                                                              | NA                 | Nat. Commun. 2019, 10, 2609                 |
| NiFeO <sub>x</sub> /B-C <sub>3</sub> N <sub>4</sub> /Mo- | 5.93                                                        | 5.96                                                                            | 92% after 10 h     | Nat. Commun. 2019, 10, 3687                 |

|                                          |             |             |                        |                             |
|------------------------------------------|-------------|-------------|------------------------|-----------------------------|
| BiVO <sub>4</sub>                        |             |             |                        |                             |
| BiVO <sub>4</sub> /N:NiFeO <sub>x</sub>  | 6.4         | NA          | Stable for 5 h         | Nat. Commun. 2021, 12, 6969 |
| nanocone/Mo:BiVO <sub>4</sub> /Fe(Ni)OOH | 5.82        | 6.05        | 94.2% after 10 h       | Sci. Adv. 2016, 2, e1501764 |
| <b>Br-MXene/BiVO<sub>4</sub>/CoBi</b>    | <b>5.47</b> | <b>5.91</b> | <b>Stable for 20 h</b> | <b>This work</b>            |

**Table S3 Flat band potentials and carrier density of BiVO<sub>4</sub>/CoBi, Cl-MXene/BiVO<sub>4</sub>/CoBi, Br-MXene/BiVO<sub>4</sub>/CoBi, and I-MXene/BiVO<sub>4</sub>/CoBi.**

| Sample                           | U <sub>flat band</sub> / V vs RHE | ND / 10 <sup>18</sup> cm <sup>-3</sup> |
|----------------------------------|-----------------------------------|----------------------------------------|
| BiVO <sub>4</sub> /CoBi          | 0.143                             | 5.04                                   |
| Cl-MXene/BiVO <sub>4</sub> /CoBi | 0.153                             | 7.61                                   |
| Br-MXene/BiVO <sub>4</sub> /CoBi | 0.187                             | 7.54                                   |
| I-MXene/BiVO <sub>4</sub> /CoBi  | 0.153                             | 12.11                                  |
